# Supplementary material
Source: PubMed Central journal article supplement (PMC4195776)
Supplement: embj0033-2113-sd7.pdf [file embj0033-2113-sd7.pdf]

## Supplementary Figure Legends

### Figure S1 - Expression profile of CB *in vivo* and MST binding curves

A A four-times longer exposure of the Western blot shown in Fig 1B.

B Interaction of the SH3 domain with CB<sub>2SH3-</sub>. Fluorescently labeled CB<sub>2SH3-</sub> or CB<sub>2SH3-</sub>/E202A were kept at 50 nM while SH3, SH3/R70A, and SH3/W24 were titrated starting at 1500  $\mu$ M in serial dilutions. Upon binding the fluorescent signal decreased.  $K_D$ s were fitted (solid lines) as shown in the table. The dashed line indicates the fit of the SH3/R70A vs. CB<sub>2SH3-</sub> titration, which did not allow for a  $K_D$  calculation due to incomplete saturation.

### Figure S2 - Additional features of the CB structures and similarity of the primary sequences of CB and Asef.

A Placement of the SH3 domain. The SH3 domain has been positioned incorrectly in the electron density map obtained after DEN refinement in CNS (Schröder *et al*, 2010) to illustrate the map quality. Correlation coefficients between the models of the SH3 domain and the corresponding map have been calculated with Phenix resulting in values of 0.74 for the correct orientation (top) vs. 0.16, 0.12 and 0.22 (from top to bottom) for the misplaced models.

B Alignment of the primary sequences of CB<sub>SH3+</sub> and human Asef. SH3, DH and PH domains are highlighted in green, magenta, and blue, respectively.

C The helix connecting the DH and PH domains adopts different conformations in different CB structures. CB<sub>SH3+</sub> is shown in magenta (DH domain) and blue (PH domain). The two CB<sub>2SH3-</sub> molecules from the Cdc42-CB<sub>2SH3-</sub> cocrystal structure are shown in light and dark gray, respectively, and the apo CB<sub>1SH3-</sub> structure is shown in cyan. Vectors describing the direction of parts of the helix connecting the DH and PH

domains are shown in corresponding colors, except for  $CB_{SH3+}$ , where the vectors are presented in red. The regions where the helix is kinked (Gln290/Ile291 or Ile301/Asp302) are highlighted in black. For simplicity the structures have been terminated at Gln308 so that the core of the PH domain is not visible.

D SDS gels of dissolved protein crystals.  $CB_{SH3+}$  (58.2 kDa, left panel, red arrow) is degraded during crystallization resulting in an approximate weight of 39 kDa (left panel, black arrow). In contrast,  $CB_{SH3+}$  is running at the same height on the SDS gel before and after crystallization, indicating no degradation (right panel, red and black arrow, respectively).

### **Figure S3 - Kratky plots and EOM-distribution for the E262A mutant of CB.**

A The Kratky plots for  $CB_{SH3+}$  (blue curve) and  $CB_{SH3+}/E262A$  (red curve) show maxima at 0.64 s/nm. However, the maximum for  $CB_{SH3+}/E262A$  is less pronounced indicating a higher flexibility than in the WT.

B Comparison of the initial random pool (blue line) and the selected ensemble (red line) of the EOM  $D_{max}$  distribution for  $CB_{SH3+}/E262A$  indicates a conformational heterogeneity of the protein in solution. Three coexisting conformational clusters are suggested by the ensemble distribution, which might be classified as compact/intermediate/extended.

### **Figure S4 - Distributions of AFM-volumes.**

AFM-volume distributions of  $CB_{SH3+}$  WT (top) and  $CB_{SH3+}/E262A$  (bottom) with peak values of  $45.5 \pm 13.3 \text{ nm}^3$  and  $54.5 \pm 10.4 \text{ nm}^3$ , respectively, corresponding to a monomer in each case. Note that for  $CB_{SH3+}/E262A$  a secondary peak at a volume of  $119.9 \pm 15.4 \text{ nm}^3$  indicating a dimer is present, however, the corresponding particles were omitted in the structural analysis since only the shapes of monomeric particles were analyzed.

Depicted are two representative experiments with n-values corresponding to the number of particles analyzed.

**Figure S5. CB binds to phosphoinositides via its PH domain and to the NL2 cytoplasmic tail via its SH3 domain.**

A GST-pulldown assay to test binding of GST-CB2<sub>SH3+</sub> and GST-CB2<sub>SH3-</sub> to gephyrin.

B Protein-lipid overlay assays using commercially available PIP-Strips. Upper left, template for the location of lipids on the membrane. LPA, lysophosphatidic acid; S1P, sphingosine-1-phosphate; LPC, lysophosphocholine; PI, phosphatidyl-inositol (PtdIns); PI(3)P, phosphatidyl-inositol-3-phosphate; PI(4)P, phosphatidyl-inositol-4-phosphate; PI(5)P, phosphatidyl-inositol-5-phosphate; PI(3,4)P<sub>2</sub>, phosphatidyl-inositol-3,4-bisphosphate; PI(3,5)P<sub>2</sub>, phosphatidyl-inositol-3,5-bisphosphate; PI(4,5)P<sub>2</sub>, phosphatidyl-inositol-4,5-bisphosphate; PI(3,4,5)P<sub>3</sub>, phosphatidyl-inositol-3,4,5-triphosphate; PA, phosphatidic acid; PE, phosphatidyl-ethanolamine; PS, phosphatidyl-serine; PC, phosphatidyl-choline. Upper right, purified GST-fusion proteins used in the assay. Bottom, bound proteins were detected using an anti-GST antibody. A GST tagged PH domain of PLC $\delta$ 1, which binds specifically to PI(4,5)P<sub>2</sub> was used as a positive control. GST-CB2/ $\Delta$ SH3 binds most strongly to PI(3)P. GST-CB2<sub>SH3+</sub> and GST-CB2<sub>SH3+</sub>/ $\Delta$ PH bind PI(3)P substantially weaker.

C GST-pulldown assay to test binding of GST-SH3 and GST-SH3/W24A and exogenously expressed NL2 cytoplasmic domain. Both GST-fusion constructs interact with NL2.

**Figure S6. Total gephyrin cluster intensity and mean intensity of VIAAT clusters in CB<sup>-/-</sup> and NL2<sup>-/-</sup> neurons transfected with CB variants.**

A Total gephyrin cluster intensity (mean intensity of gephyrin clusters x average size of gephyrin clusters x density of gephyrin clusters) induced by overexpression of CB

variants in  $CB^{-/-}$  neurons, arbitrary units (a.u.).  $CB2_{SH3+}$ :  $0.88 \pm 0.08$ ;  $CB2_{SH3+}/W52A$ :  $0.47 \pm 0.05$ ,  $P < 0.001$ ;  $CB2_{SH3+}/W24A-E262A$ :  $1.43 \pm 0.12$ ,  $P < 0.001$ ;  $CB2/\Delta SH3$ :  $2.34 \pm 0.17$ ,  $P < 0.001$ ; GFP (no CB):  $0.04 \pm 0.01$ ,  $P < 0.001$ .

B Total gephyrin cluster intensity (mean intensity of gephyrin clusters x average size of gephyrin clusters x density of gephyrin clusters) induced by overexpression of CB variants in  $NL2^{-/-}$  neurons, arbitrary units (a.u.).  $CB2_{SH3+}$ :  $0.46 \pm 0.09$ ;  $CB2_{SH3+}/W52A$ :  $0.39 \pm 0.08$ , n.s.;  $CB2_{SH3+}/W24A-E262A$ :  $1.21 \pm 0.18$ ,  $P < 0.001$ ;  $CB2/\Delta SH3$ :  $1.85 \pm 0.18$ ,  $P < 0.001$ ; GFP (no CB):  $0.49 \pm 0.24$ , n.s.

C Average size of perisomatic VIAAT clusters in  $CB^{-/-}$  neurons overexpressing CB variants, in  $\mu m^2$ .  $CB2_{SH3+}$ :  $0.202 \pm 0.006$ ;  $CB2_{SH3+}/W52A$ :  $0.212 \pm 0.009$ , n.s.;  $CB2_{SH3+}/W24A-E262A$ :  $0.219 \pm 0.009$ , n.s.;  $CB2/\Delta SH3$ :  $0.270 \pm 0.009$ ,  $P < 0.001$ ; GFP (no CB):  $0.233 \pm 0.010$ ,  $P < 0.01$ .

D Average size of perisomatic VIAAT clusters in  $NL2^{-/-}$  neurons overexpressing CB variants, in  $\mu m^2$ .  $CB2_{SH3+}$ :  $0.230 \pm 0.013$ ;  $CB2_{SH3+}/W52A$ :  $0.244 \pm 0.013$ , n.s.;  $CB2_{SH3+}/W24A-E262A$ :  $0.243 \pm 0.012$ , n.s.;  $CB2/\Delta SH3$ :  $0.243 \pm 0.012$ , n.s.; GFP (no CB):  $0.264 \pm 0.014$ , n.s.

E Mean intensity of VIAAT clusters in  $CB^{-/-}$  neurons overexpressing CB variants, arbitrary units (a.u.).  $CB2_{SH3+}$ :  $62.5 \pm 0.7$ ;  $CB2_{SH3+}/W52A$ :  $61.7 \pm 1.2$ , n.s.;  $CB2_{SH3+}/W24A-E262A$ :  $63.8 \pm 1.0$ , n.s.;  $CB2/\Delta SH3$ :  $67.0 \pm 1.2$ ,  $P < 0.001$ ; GFP (no CB):  $68.7 \pm 1.2$ ,  $P < 0.001$ .

F Mean intensity of VIAAT clusters in  $NL2^{-/-}$  neurons overexpressing CB variants, arbitrary units (a.u.).  $CB2_{SH3+}$ :  $67.3 \pm 1.3$ ;  $CB2_{SH3+}/W52A$ :  $69.3 \pm 1.9$ , n.s.;  $CB2_{SH3+}/W24A-E262A$ :  $68.4 \pm 1.4$ , n.s.;  $CB2/\Delta SH3$ :  $70.1 \pm 1.7$ , n.s.; GFP (no CB):  $75.6 \pm 1.3$ ,  $P < 0.001$ .

**Table S1. Data collection and refinement statistics.**

|                                       | <b>CB<sub>SH3+</sub></b> | <b>CB1<sub>SH3-</sub></b> |
|---------------------------------------|--------------------------|---------------------------|
| <b>Crystal parameters</b>             |                          |                           |
| Space group                           | I2 <sub>1</sub> 3        | C222 <sub>1</sub>         |
| Cell dimension a (Å)                  | 217.4                    | 82.93                     |
| Cell dimension b (Å)                  | 217.4                    | 165.43                    |
| Cell dimension c (Å)                  | 217.4                    | 129.12                    |
| <b>Data collection</b>                |                          |                           |
| Wavelength (Å)                        | 0.8726                   | 0.8726                    |
| Resolution (Å)                        | 108.7 - 5.5              | 64.6 – 3.5                |
| R <sub>merge</sub> <sup>*</sup>       | 0.181 (1.903)            | 0.080 (0.714)             |
| R <sub>pim</sub>                      | 0.049 (0.489)            | 0.042 (0.372)             |
| <I/σI>                                | 10.8 (1.8)               | 9.5 (1.8)                 |
| Completeness (%)                      | 100.0 (100.0)            | 99.9 (100.0)              |
| Redundancy                            | 11.0 (11.0)              | 4.5 (4.6)                 |
| CC <sub>1/2</sub>                     | 1.0 (0.46)               | 1.0 (0.80)                |
| <b>Refinement</b>                     |                          |                           |
| Resolution (Å)                        | 108.7 - 5.5              | 50.9 - 3.5                |
| No. of reflections                    | 6,812                    | 11,474                    |
| R <sub>work</sub> / R <sub>free</sub> | 0.2367/0.2820            | 0.2207/0.2487             |
| Average B factor (Å <sup>2</sup> )    | 177.1                    | 120.9                     |
| Number of nonhydrogen atoms           | 3717                     | 2859                      |
| <b>Stereochemistry</b>                |                          |                           |
| Rmsd bond lengths (Å)                 | 0.004                    | 0.005                     |
| Rmsd bond angles (°)                  | 0.682                    | 0.923                     |
| Ramachandran outliers (%)             | 1.8                      | 1.5                       |
| Ramachandran favored (%)              | 90.8                     | 93.4                      |

\*Values in parentheses represent the highest-resolution shell.

$R_{\text{sym}}^a = \frac{\sum_{hkl} \sum_i |I_i - \langle I \rangle|}{\sum_{hkl} \sum_i I_i}$  where  $I_i$  is the  $i^{\text{th}}$  measurement and  $\langle I \rangle$  is the weighted mean of all measurements of  $I$ .

$R_{\text{pim}}^b = \frac{\sum_{hkl} 1/(N-1)^{1/2} \sum_i |I_i(hkl) - I(hkl)|}{\sum_{hkl} \sum_i I(hkl)}$ , where N is the redundancy of the data and  $I(hkl)$  the average intensity.

$\langle I/\sigma I \rangle^c$  indicates the average of the intensity divided by its standard deviation.

$R^d = \sum_{hkl} ||F_o| - |F_c|| / \sum_{hkl} |F_o|$  where  $F_o$  and  $F_c$  are the observed and calculated structure factor amplitudes.

$R_{free}^e$  same as  $R$  for 5% of the data randomly omitted from the refinement. The number of reflections includes the  $R_{free}$  subset.

**Table S2. Comparison of CB structures.**

|                              | CB <sub>SH3+</sub> | CB <sub>SH3-</sub>              | CB <sub>2SH3</sub> . chain A    | CB <sub>2SH3-</sub> chain C     | domain |
|------------------------------|--------------------|---------------------------------|---------------------------------|---------------------------------|--------|
| CB <sub>SH3+</sub>           | x                  | 1.43 Å                          | 1.45 Å                          | 1.52 Å                          | DH     |
| CB <sub>SH3+</sub>           | x                  | 1.30 Å<br>( $\chi=59.1^\circ$ ) | 1.22 Å<br>( $\chi=62.7^\circ$ ) | 1.31 Å<br>( $\chi=92.3^\circ$ ) | PH     |
| CB <sub>SH3-</sub>           | x                  | x                               | 0.34 Å                          | 0.48 Å                          | DH     |
| CB <sub>SH3-</sub>           | x                  | x                               | 0.44 Å<br>( $\chi=54.7^\circ$ ) | 0.68 Å<br>( $\chi=70.0^\circ$ ) | PH     |
| CB <sub>2SH3</sub> . chain A | x                  | x                               | x                               | 0.44 Å                          | DH     |
| CB <sub>2SH3</sub> . chain A | x                  | x                               | x                               | 0.55 Å<br>( $\chi=37.8^\circ$ ) | PH     |

RMSDs of the individual DH and PH domains and angles describing PH domain rotations. While almost no intra-domain conformational changes are present as reflected by low RMSD values, entire domains undergo significant rotations.

**Table S3. SAXS data collection and analysis.**

| <b>Data collection parameters</b>              |                                                                  |                          |
|------------------------------------------------|------------------------------------------------------------------|--------------------------|
| Instrument (detector)                          | X33, EMBL, DORIS<br>PILATUS 1M pixel (67 x 420 mm <sup>2</sup> ) |                          |
| Beam geometry                                  | 2 x 0.06 mm <sup>2</sup>                                         |                          |
| Wavelength (Å)                                 | 1.5                                                              |                          |
| s range (Å <sup>-1</sup> )                     | 0.006-0.6                                                        |                          |
| Exposure time (sec)                            | 8 x 15                                                           |                          |
|                                                | CB <sub>SH3+</sub> WT                                            | CB <sub>SH3+</sub> E262A |
| Concentration range (mg ml <sup>-1</sup> )     | 0.8-6.6                                                          | 0.27-1.0                 |
| Temperature (K)                                | 283                                                              | 283                      |
| <b>Structural parameters</b>                   |                                                                  |                          |
| I(0) (relative) [from P(r)]                    | 51.8±20                                                          | 75.3±20                  |
| R <sub>g</sub> (Å) [from P(r)]                 | 29.0±2                                                           | 36.8±2                   |
| I(0) (relative) [from Guinier]                 | 54.8±20                                                          | 77.3±20                  |
| R <sub>g</sub> (Å) [from Guinier]              | 31.0±2                                                           | 36.7±2                   |
| D <sub>max</sub> (Å) [from P(r)]               | 95±10                                                            | 125±10                   |
| Porod volume estimate (Å <sup>3</sup> )        | 79,000±1,000                                                     | 92,000±1,000             |
| Dammif excluded volume (Å <sup>3</sup> )       | 114,000±1,000                                                    | 134,000±1,000            |
| <b>Molecular mass determination</b>            |                                                                  |                          |
| Molecular mass Mr (kDa) [from Porod invariant] | 48±5                                                             | 55±5                     |
| Molecular mass Mr (kDa) [from excluded volume] | 57±5                                                             | 67±5                     |
| Calculated monomeric Mr (kDa) [from sequence]* | ~53                                                              | ~53                      |
| <b>Software employed</b>                       |                                                                  |                          |
| Primary data reduction                         | Automated PIPELINE (RADAVER)                                     |                          |
| Data processing                                | PRIMUS                                                           |                          |
| <i>Ab initio</i> analysis                      | DAMMIF                                                           |                          |
| Validation and averaging                       | DAMAVER                                                          |                          |
| Rigid body modeling                            | BUNCH                                                            |                          |
| Flexibility                                    | EOM                                                              |                          |
| Computation of model intensities               | CRYSOL                                                           |                          |
| 3D graphics representations                    | VMD                                                              |                          |



**Table S4. Comparison of overall structural parameters resulting from the use of either BUNCH or EOM for CB<sub>SH3+</sub>/E262A.**

|                          | <b>R<sub>G</sub> (Å)</b> | <b>D<sub>max</sub> (Å)</b> | <b>χ</b> | <b>N models</b> |
|--------------------------|--------------------------|----------------------------|----------|-----------------|
| <b>Experimental data</b> | 36.7±2.0                 | 125±10                     | -        | -               |
| <b>BUNCH</b>             | 33.6                     | 116.1                      | 0.788    | 1               |
| <b>EOM</b>               | 36.8                     | 124.6                      | 0.765    | 6               |
